# Supplementary material for: Effects of Dietary Sugar Reduction on Biomarkers of Cardiometabolic Health in Latino Youth: Secondary Analyses from a Randomized Controlled Trial
Source: MDPI journal article supplement (doi:10.3390/nu15153338), 2023-07-27
Supplement: s1 [file s1]

**Effects of dietary sugar reduction on biomarkers of cardiometabolic  
health in Latino youth: secondary analyses  
from a randomized controlled trial**

Schmidt et al. Online Supporting Material

**Table S1.** Dietary intakes at baseline and the change in intakes during the intervention period, based on unannounced 24-hour dietary recalls, for all participants with complete diet data (n=88)

|                       | Intervention (n=49) |                  | Control (n=39)    |                 | ANCOVA |          | GEE             |
|-----------------------|---------------------|------------------|-------------------|-----------------|--------|----------|-----------------|
|                       | Baseline            | Change           | Baseline          | Change          | Raw    | Adjusted | Sex interaction |
| Energy intake, kcal/d | 1470 (1224, 1791)   | -72 ± 502        | 1509 (1227, 1727) | -75 ± 447       | 0.79   | 0.80     | 0.70            |
| Carbohydrates, %E     | 49.8 (44.5, 55.0)   | -2.9 ± 8.7       | 48.0 (45.7, 53.7) | -0.7 ± 11.9     | 0.25   | 0.30     | 0.82            |
| Total sugar, %E       | 18.6 ± 6.6          | -4.8 ± 7.5       | 20.0 ± 6.2        | -2.1 ± 9.1      | <0.01  | <0.01    | 0.84            |
| Added sugars, %E      | 11.1 ± 6.62         | -3.7 ± 7.1       | 13.1 ± 5.5        | -2.6 ± 7.5      | 0.01   | 0.02     | 0.74            |
| Free sugars, %E       | 11.7 ± 6.1          | -4.8 ± 6.5       | 13.7 ± 6.5        | -3.1 ± 8.3      | <0.01  | <0.01    | 0.66            |
| Fiber, g/day          | 13.2 (10.1, 18.1)   | -0.6 (-4.0, 3.3) | 12.3 (8.2, 15.9)  | 0.1 (-5.4, 4.0) | 0.23   | 0.21     | 0.93            |
| Fiber, %E             | 3.5 (2.6, 4.2)      | -0.1 (-0.9, 1.0) | 3.3 (2.5, 4.1)    | 0.2 (-0.6, 1.0) | 0.53   | 0.54     | 0.88            |
| Fat, %E               | 33.9 ± 7.0          | 1.4 ± 7.2        | 32.2 ± 5.3        | 1.1 ± 9.5       | 0.14   | 0.16     | 0.90            |
| SFA, %E               | 11.7 (8.9, 13.3)    | 0.4 ± 4.0        | 10.1 (8.9, 12.8)  | 0.8 ± 4.2       | 0.78   | 0.75     | 0.74            |
| MUFA, %E              | 12.1 (10.2, 14.3)   | 0.7 ± 3.4        | 10.6 (8.6, 13.1)  | 0.4 ± 4.6       | 0.18   | 0.22     | 0.76            |
| PUFA, %E              | 8.2 (7.2, 10.1)     | 0.0 ± 3.1        | 7.1 (5.9, 10.1)   | 0.2 ± 3.5       | 0.26   | 0.28     | 0.25            |
| Protein, %E           | 16.8 ± 4.6          | 1.5 ± 4.9        | 17.8 ± 4.6        | -0.3 ± 4.8      | 0.13   | 0.16     | 0.19            |

Values are means ± standard deviations or medians (25<sup>th</sup>, 75<sup>th</sup> percentiles) for non-normally distributed variables

Raw: change adjusted for baseline value

---

Adjusted: raw model adjusted for sex, change in body mass index, change in physical activity

Abbreviations: ANCOVA: Analysis of covariance, GEE: generalized estimating equation, MUFA: monounsaturated fatty acids, PUFA: polyunsaturated fatty acids, SFA: saturated fatty acids, %E: percent of total energy intake

GEE: generalized estimating equation analysis of adjusted model further adjusting for sibling clusters

---

**Table S2.** The effect of total sugar intake on glucose tolerance and its determinants in the primary analysis.

|                                              | $\Delta$ total sugar (%E) <0 |                           | $\Delta$ total sugar (%E) $\geq$ 0 |                           | Raw  | ANCOVA   |                    | GEE      |
|----------------------------------------------|------------------------------|---------------------------|------------------------------------|---------------------------|------|----------|--------------------|----------|
|                                              | Baseline                     | Change                    | Baseline                           | Change                    |      | Adjusted | Sex<br>Interaction | Adjusted |
| Fasting Glucose (mg/dL) <sup>1</sup>         | 85.2 $\pm$ 7.5               | 0.2 (-5.8, 4.5)           | 85.3 $\pm$ 8.4                     | 0.9 (-1.9, 3.9)           | 0.73 | 0.58     | 0.64               | 0.65     |
| 2-hour glucose (mg/dL) <sup>2</sup>          | 115 $\pm$ 21                 | 1 $\pm$ 22                | 116 $\pm$ 18                       | 3 $\pm$ 21                | 0.65 | 0.70     | 0.19               | 0.69     |
| HbA1c (%) <sup>3</sup>                       | 5.5 $\pm$ 0.3                | 0.0 (-0.1, 0.1)           | 5.4 $\pm$ 0.4                      | 0.0 (-0.1, 0.1)           | 0.61 | 0.69     | 0.87               | 0.67     |
| AUC glucose (mg/dL x min) <sup>4</sup>       | 14,719 $\pm$ 2,177           | -167 $\pm$ 1,828          | 14,708 $\pm$ 1,651                 | 33 $\pm$ 1,555            | 0.60 | 0.56     | 0.37               | 0.56     |
| Fasting Insulin ( $\mu$ U/mL) <sup>5</sup>   | 26.1 (15.9, 36.1)            | -0.9 (-11.9, 6.5)         | 17.4 (13.6, 38.0)                  | -1.7 (-9.2, 2.7)          | 0.97 | 0.93     | 0.25               | 0.82     |
| 2-hour insulin ( $\mu$ U/mL) <sup>6</sup>    | 239.4<br>(129.8, 402.7)      | -7.0<br>(-126.5, 98.4)    | 316.8<br>(200.7, 498.8)            | -75.0<br>(-119.8, 90.1)   | 0.70 | 0.83     | 0.12               | 0.40     |
| HOMA-IR <sup>7</sup>                         | 5.5 (3.4, 8.5)               | -0.3 (-2.3, 1.5)          | 4.3 (2.9, 9.2)                     | -0.7 (-2.3, 0.6)          | 0.68 | 0.60     | 0.95               | 0.49     |
| Matsuda ISI <sup>8</sup>                     | 1.1 (0.7, 1.6)               | 0.1 $\pm$ 0.8             | 1.1 (0.6, 2.0)                     | 0.1 $\pm$ 0.6             | 0.95 | 0.99     | 0.19               | 0.98     |
| AUC Insulin ( $\mu$ U/mL x min) <sup>9</sup> | 20,885<br>(13,812, 32,053)   | -2,135<br>(-7,292, 5,244) | 23,047<br>(15,727, 38,691)         | -1,061<br>(-6,896, 4,801) | 0.72 | 0.80     | 0.37               | 0.51     |
| Insulinogenic Index <sup>7</sup>             | 5.7 (4.1, 8.5)               | 0.6 (-1.3, 2.4)           | 5.6 (4.6, 8.2)                     | 0.3 (-1.5, 1.0)           | 0.56 | 0.56     | 0.91               | 0.44     |
| Oral DI <sup>10</sup>                        | 6.4 (4.3, 8.7)               | 1.5 $\pm$ 5.2             | 6.8 (3.0, 11.2)                    | 0.6 $\pm$ 4.6             | 0.47 | 0.41     | 0.21               | <0.001   |

Values are means  $\pm$  standard deviations or medians (25<sup>th</sup>, 75<sup>th</sup> percentiles) for non-normally distributed variables

Raw: adjusted for baseline value of the outcome of interest

Adjusted: raw model adjusted for sex, change in body mass index, and change in physical activity

---

GEE: generalized estimating equation analysis of adjusted model further adjusting for sibling clusters

1 Sample size:  $\Delta$  total sugar (%E) <0 (n=60),  $\Delta$  total sugar (%E)  $\geq$  0 (n=26), sibling cluster (n=10)

2 Sample size:  $\Delta$  total sugar (%E) <0 (n=60),  $\Delta$  total sugar (%E)  $\geq$  0 (n=24), sibling cluster (n=10)

3 Sample size:  $\Delta$  total sugar (%E) <0 (n=60),  $\Delta$  total sugar (%E)  $\geq$  0 (n=25), sibling cluster (n=10)

4 Sample size:  $\Delta$  total sugar (%E) <0 (n=57),  $\Delta$  total sugar (%E)  $\geq$  0 (n=24), sibling cluster (n=9)

5 Sample size:  $\Delta$  total sugar (%E) <0 (n=55),  $\Delta$  total sugar (%E)  $\geq$  0 (n=23), sibling cluster (n=8)

6 Sample Size:  $\Delta$  total sugar (%E) <0 (n=59),  $\Delta$  total sugar (%E)  $\geq$  0 (n=27), sibling cluster (n=9)

7 Sample Size:  $\Delta$  total sugar (%E) <0 (n=58),  $\Delta$  total sugar (%E)  $\geq$  0 (n=25), sibling cluster (n=9)

8 Sample Size:  $\Delta$  total sugar (%E) <0 (n=56),  $\Delta$  total sugar (%E)  $\geq$  0 (n=25), sibling cluster (n=8)

9 Sample size:  $\Delta$  total sugar (%E) <0 (n=53),  $\Delta$  total sugar (%E)  $\geq$  0 (n=24), sibling cluster (n=8)

10 Sample size:  $\Delta$  total sugar (%E) <0 (n=55),  $\Delta$  total sugar (%E)  $\geq$  0 (n=24), sibling cluster (n=8)

Abbreviations: ANCOVA: analysis of covariance, AUC: area under the curve, GEE: generalized estimating equation, HbA1c: glycated hemoglobin, HOMA-IR: homeostatic model assessment of insulin resistance, ISI: insulin sensitivity index, oral DI: oral disposition index

---

**Table S3.** The effect of total sugar intake on serum lipids and blood pressure in the primary analysis.

|                                         | <b>Δ total sugar (%E) &lt;0</b> |                      | <b>Δ total sugar (%E) ≥ 0</b> |                      | <b>ANCOVA</b> |          | <b>GEE</b>         |          |
|-----------------------------------------|---------------------------------|----------------------|-------------------------------|----------------------|---------------|----------|--------------------|----------|
|                                         | Baseline                        | Change               | Baseline                      | Change               | Raw           | Adjusted | Sex<br>interaction | Adjusted |
| Cholesterol (mg/dL) <sup>1</sup>        | 143.0<br>(127.8, 159.0)         | -1.8 ± 13.7          | 147.5<br>(135.8, 153.0)       | 0.9 ± 13.7           | 0.28          | 0.42     | 0.42               | 0.58     |
| Triglycerides (mg/dL) <sup>2</sup>      | 94.0<br>(78.0, 128.0)           | 0.0<br>(-14.5, 19.0) | 107.0<br>(83.5, 144.5)        | 7.0<br>(-11.0, 35.0) | 0.047         | 0.049    | 0.91               | 0.06     |
| LDL cholesterol<br>(mg/dL) <sup>1</sup> | 81.6 ± 24.0                     | -2.2 ± 12.7          | 80.4 ± 19.0                   | -1.1 ± 9.3           | 0.74          | 1.0      | 0.88               | 0.70     |
| HDL cholesterol<br>(mg/dL) <sup>3</sup> | 39.0<br>(35.0, 44.0)            | 0.3 ± 4.6            | 40.0<br>(36.0, 44.5)          | -1.4 ± 3.9           | 0.20          | 0.27     | 0.11               | 0.19     |
| Cholesterol:HDL <sup>4</sup>            | 3.7 ± 1.0                       | -0.1 ± 0.5           | 3.6 ± 1.0                     | 0.1 ± 0.4            | 0.046         | 0.08     | 0.45               | 0.08     |
| Systolic BP (mmHg) <sup>5</sup>         | 116.0 ± 12.2                    | -2.5 ± 9.4           | 115.4 ± 8.7                   | -2.0 ± 8.7           | 0.87          | 0.92     | 0.97               | 0.94     |
| Diastolic BP (mmHg) <sup>6</sup>        | 68.8 ± 6.8                      | -1.0<br>(-5.1, 3.5)  | 69.4 ± 6.1                    | -0.5<br>(-2.4, 2.4)  | 0.43          | 0.42     | 0.77               | 0.38     |

Values are means ± standard deviations or medians (25<sup>th</sup>, 75<sup>th</sup> percentiles) for non-normally distributed variables

Raw: adjusted for baseline value of the outcome of interest

Adjusted: raw model adjusted for sex, change in body mass index, and change in physical activity

\*GEE: generalized estimating equation analysis of adjusted model further adjusting for sibling clusters (n=10)

---

1 Sample Size:  $\Delta$  total sugar (%E)  $<0$  (n=60),  $\Delta$  total sugar (%E)  $\geq 0$  (n=24), sibling cluster (n=10)

2 Sample Size:  $\Delta$  total sugar (%E)  $<0$  (n=59),  $\Delta$  total sugar (%E)  $\geq 0$  (n=23), sibling cluster (n=10)

3 Sample Size:  $\Delta$  total sugar (%E)  $<0$  (n=60),  $\Delta$  total sugar (%E)  $\geq 0$  (n=22), sibling cluster (n=10)

4 Sample size:  $\Delta$  total sugar (%E)  $<0$  (n=61),  $\Delta$  total sugar (%E)  $\geq 0$  (n=24), sibling cluster (n=10)

5 Sample size:  $\Delta$  total sugar (%E)  $<0$  (n=62),  $\Delta$  total sugar (%E)  $\geq 0$  (n=26), sibling cluster (n=10)

6 Sample size:  $\Delta$  total sugar (%E)  $<0$  (n=60),  $\Delta$  total sugar (%E)  $\geq 0$  (n=26), sibling cluster (n=10)

Abbreviations: ANCOVA: analysis of covariance, BP: blood pressure, GEE: generalized estimating equation, HDL:

high-density lipoprotein, LDL: low-density lipoprotein

---

**Table S4.** The effect of total sugar intake on adipokines and inflammatory markers in the primary analysis.

|                        | $\Delta$ total sugar (%E) <0 |                  | $\Delta$ total sugar (%E) $\geq$ 0 |                  | Raw  | ANCOVA   |                 | GEE      |
|------------------------|------------------------------|------------------|------------------------------------|------------------|------|----------|-----------------|----------|
|                        | Baseline                     | Change           | Baseline                           | Change           |      | Adjusted | Sex interaction | Adjusted |
| CRP <sup>1</sup>       | 2.3 (0.8, 6.2)               | -0.1 (-1.0, 1.1) | 1.3 (0.5, 4.0)                     | -0.1 (-0.5, 0.7) | 0.67 | 0.77     | 0.62            | 0.66     |
| IL-6 <sup>2</sup>      | 8.1 (5.1, 31.5)              | -0.6 (-2.7, 4.4) | 9.0 (5.7, 59.4)                    | 2.0 (-3.2, 5.9)  | 0.21 | 0.25     | 0.17            | 0.37     |
| TNF-alpha <sup>3</sup> | 3.0 $\pm$ 1.0                | 0.1 (-0.3, 0.9)  | 2.7 $\pm$ 1.1                      | 0.2 (-0.2, 0.4)  | 0.06 | 0.02     | 0.43            | 0.02     |
| MCP-1 <sup>4</sup>     | 105 $\pm$ 29                 | 2 $\pm$ 22       | 95 $\pm$ 30                        | 6 $\pm$ 24       | 0.72 | 0.78     | 0.39            | 0.84     |
| Leptin <sup>5</sup>    | 7520<br>(4406, 10699)        | -407 $\pm$ 2640  | 6176<br>(3524, 10492)              | 124 $\pm$ 2531   | 0.56 | 0.83     | 0.84            | 0.80     |

Values are means  $\pm$  standard deviations or medians (25<sup>th</sup>, 75<sup>th</sup> percentiles) for non-normally distributed variables

Raw: adjusted for baseline value of the outcome of interest

Adjusted: raw model adjusted for sex, change in body mass index, and change in physical activity

GEE: generalized estimating equation analysis of adjusted model further adjusting for sibling clusters

<sup>1</sup> Sample size:  $\Delta$  total sugar (%E) <0 (n=55),  $\Delta$  total sugar (%E)  $\geq$  0 (n=24), sibling cluster (n=8)

<sup>2</sup> Sample size:  $\Delta$  total sugar (%E) <0 (n=36),  $\Delta$  total sugar (%E)  $\geq$  0 (n=18), sibling cluster (n=6)

<sup>3</sup> Sample size:  $\Delta$  total sugar (%E) <0 (n=58),  $\Delta$  total sugar (%E)  $\geq$  0 (n=26), sibling cluster (n=9)

<sup>4</sup> Sample size:  $\Delta$  total sugar (%E) <0 (n=60),  $\Delta$  total sugar (%E)  $\geq$  0 (n=26), sibling cluster (n=9)

<sup>5</sup> Sample size:  $\Delta$  total sugar (%E) <0 (n=60),  $\Delta$  total sugar (%E)  $\geq$  0 (n=27), sibling cluster (n=9)



---

Abbreviations: ANCOVA: analysis of covariance, BMI: body mass index, CRP: C-reactive protein, GEE: generalized estimating equations,

IL-6: interleukin-6, MCP-1: monocyte chemoattractant protein-1

---

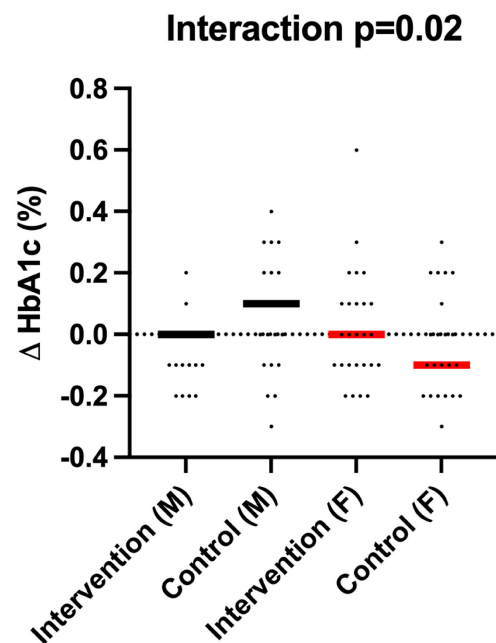

**Figure S1. Changes in HbA1c differ by participant sex.** Changes in HbA1c (post-intervention minus the value at baseline) for participants by intervention group and participant sex. Each participant's change variable is represented by a solid dot. The medians are represented by horizontal bars. The p-value for sex-by-treatment interaction in the analysis of covariance adjusted for the baseline HbA1c, change in body mass index, and change in physical activity is displayed at the top of the plot. ANCOVA: analysis of covariance, HbA1c: glycated hemoglobin,

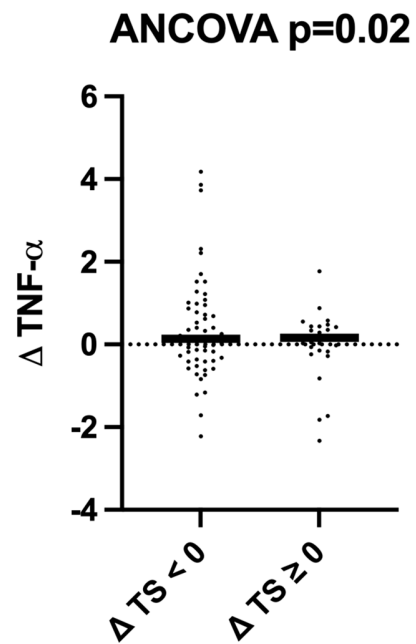

**Figure S2.** Changes (post-intervention minus the value at baseline) in TNF- $\alpha$  for participants with total sugar reduction as a percent of energy ( $\Delta TS < 0$ ) and those without ( $\Delta TS \geq 0$ ). Each participant's change variable is represented by a solid dot. The medians are represented by horizontal bars. The p-value for the analysis of covariance adjusted for the change in body mass index and change in physical activity is displayed at the top of the plot. ANCOVA: analysis of co-variance, TNF- $\alpha$ :Tumor Necrosis Factor –Alpha, TS: Total Sugar
